# Supplementary material for: Link Ecological and Social Composite Systems to Construct Sustainable Landscape Patterns: A New Framework Based on Ecosystem Service Flows
Source: MDPI journal article supplement (doi:10.3390/rs14184663), 2022-09-19
Supplement: s1 [file s1]

**Table S1.** Sensitivity Table. Table mapping each LULC class to data about the species' habitat preference and threat sensitivity in areas with that LULC. L\_aqu: Aquaculture; L\_far: Dryland and Paddy field; L\_res: Residential land; L\_ind: Industrial land.

| LULC | NAME                        | HABITAT | L_aqu | L_far | L_res | L_ind |
|------|-----------------------------|---------|-------|-------|-------|-------|
| 1    | Estuary waters and sandbars | 0.9     | 0.5   | 0.6   | 0.7   | 0.6   |
| 2    | Tidal flat                  | 0.9     | 0.4   | 0.6   | 0.7   | 0.7   |
| 3    | Tidal creek                 | 0.9     | 0.4   | 0.6   | 0.7   | 0.6   |
| 4    | Intertidal salt marshes     | 1       | 0.4   | 0.5   | 0.7   | 0.6   |
| 5    | Reed                        | 1       | 0.3   | 0.5   | 0.7   | 0.6   |
| 6    | Inland salt planting        | 1       | 0.3   | 0.5   | 0.7   | 0.6   |
| 7    | Aquaculture                 | 0.4     | 0.2   | 0.4   | 0.7   | 0.7   |
| 8    | River                       | 0.8     | 0.8   | 0.7   | 0.9   | 0.8   |
| 9    | Inland water                | 0.8     | 0.8   | 0.7   | 0.9   | 0.8   |
| 10   | Paddy field                 | 0.3     | 0.3   | 0.3   | 0.6   | 0.5   |
| 11   | Dryland                     | 0.2     | 0.2   | 0.3   | 0.6   | 0.5   |
| 12   | Residential land            | 0       | 0     | 0     | 0     | 0     |
| 13   | Industrial land             | 0       | 0     | 0     | 0     | 0     |
| 14   | Uncultivated land           | 0.7     | 0.4   | 0.6   | 0.7   | 0.7   |

**Table S2.** Threats Table. Table mapping each threat of interest to its properties and distribution maps.

| MAX_DIST | WEIGHT | THREAT           | DECAY       |
|----------|--------|------------------|-------------|
| 1        | 0.5    | Aquaculture      | linear      |
| 3        | 0.7    | Farmland         | linear      |
| 5        | 1      | Residential land | exponential |
| 5        | 1      | Industrial land  | exponential |

**Table S3.** LULC types and the components of their carbon pools. C-above: amount of carbon stored in aboveground biomass; C-below: amount of carbon stored in belowground biomass; C-soil: amount of carbon stored in soil; C-dead: amount of carbon stored in dead organic matter.

| Code | LULC types              | C-above<br>(Mg/hm <sup>2</sup> ) | C-below<br>(Mg/hm <sup>2</sup> ) | C-soil<br>(Mg/hm <sup>2</sup> ) | C-dead<br>(Mg/hm <sup>2</sup> ) |
|------|-------------------------|----------------------------------|----------------------------------|---------------------------------|---------------------------------|
| 1    | Tidal flat              | 0.44                             | 2.09                             | 10.63                           | 0.03                            |
| 2    | Tidal creek             | 0.44                             | 2.09                             | 10.63                           | 0.03                            |
| 3    | Intertidal salt marshes | 0.44                             | 2.09                             | 10.63                           | 0.03                            |
| 4    | Reed                    | 1.26                             | 6.01                             | 12.81                           | 0.22                            |
| 5    | Inland salt planting    | 0.44                             | 2.09                             | 10.77                           | 0.03                            |
| 6    | River                   | 0                                | 0                                | 0                               | 0                               |
| 7    | Inland water            | 0                                | 0                                | 0                               | 0                               |
| 8    | Paddy field             | 0.69                             | 3.29                             | 11.48                           | 0.05                            |
| 9    | Dryland                 | 0.69                             | 3.29                             | 13.09                           | 0.05                            |
| 10   | Residential land        | 0                                | 0                                | 9.75                            | 0                               |

|    |                             |      |   |       |   |
|----|-----------------------------|------|---|-------|---|
| 11 | Industrial land             | 0    | 0 | 6.14  | 0 |
| 12 | Aquaculture                 | 2.31 | 0 | 7.47  | 0 |
| 13 | Uncultivated land           | 0    | 0 | 10.54 | 0 |
| 14 | Estuary waters and sandbars | 0    | 0 | 0     | 0 |

Note. In this study, the main indicators whose samples were analyzed were above-ground biomass and soil organic carbon content. Depending on the characteristics of the region, the carbon sink of salt marsh wetland plants was the focus of the study (e. g. reeds and alkali ponies). Plant samples were dried in an oven at 80°C to measure their above-ground biomass (C-above). It should be noted that tidal flats, tidal creeks, intertidal salt marshes and inland salt plants use the same aboveground biomass data in this paper, i.e., the same density of aboveground carbon pools. The numerical relationship between belowground biomass (C-below) and aboveground biomass was determined based on the root-to-shoot ratio R/S. The root to shoot ratio in this study area is about 4.76 according to the climate zone revision. *Clams* have a large share in aquaculture in this region, so the biomass carbon pool accounting parameters for aquaculture refer to *clams*. The sum of carbon absorbed by soft tissues and shells of shellfish is the biomass carbon stock. Soil carbon pools (C-soil) were determined based on soil organic carbon content and conversion factors. Soil organic carbon was measured using a total organic carbon analyzer (HT1300, Analytik Jena AG, Germany) after removal of soil calcium carbonate with hydrochloric acid. In addition, the carbon pool of dead organic matter (C-dead) was determined based on above-ground biomass and conversion factors. Based on the final carbon pool table and land use data, we obtained the distribution of carbon sequestration services in the region.

**Figure S1.** Remote sensing interpretation accuracy assessment. The "columns" are validation data, and the "rows" are interpretation results.

| Classname                    | Aquaculture | Dryland  | Estuarine Waters And Sandbar | Industrial Land | Inland Salt Plants | Inland Water | Intertidal Salt Marshes | Paddy Field | Reed      | Residential Land | River     | Tidal Creek | Tidal Flat | Uncultivated Land | Total      | User's Accuracy |
|------------------------------|-------------|----------|------------------------------|-----------------|--------------------|--------------|-------------------------|-------------|-----------|------------------|-----------|-------------|------------|-------------------|------------|-----------------|
| Aquaculture                  | 22          |          |                              |                 |                    | 1            |                         |             |           |                  |           |             |            |                   | 23         | 95.65%          |
| Dryland                      |             | 3        |                              |                 |                    |              |                         | 1           |           |                  |           |             |            |                   | 4          | 75%             |
| Estuarine Waters And Sandbar |             |          |                              | 11              |                    |              |                         |             |           |                  |           |             |            |                   | 11         | 100%            |
| Industrial Land              |             |          |                              | 12              |                    |              |                         |             |           |                  |           |             |            |                   | 12         | 100%            |
| Inland Salt Plants           |             |          |                              |                 | 10                 |              |                         | 1           |           |                  |           |             |            | 1                 | 12         | 83.33%          |
| Inland Water                 | 1           |          |                              |                 |                    | 11           |                         |             |           |                  |           |             |            |                   | 12         | 91.67%          |
| Intertidal Salt Marshes      |             |          | 1                            |                 |                    |              | 13                      |             |           |                  |           | 2           |            |                   | 16         | 81.25%          |
| Paddy Field                  |             | 2        |                              |                 | 2                  |              |                         | 80          | 2         |                  |           |             |            |                   | 86         | 93.02%          |
| Reed                         |             |          | 1                            |                 | 2                  |              | 1                       | 2           | 93        |                  |           |             |            |                   | 99         | 93.94%          |
| Residential Land             | 1           |          |                              |                 |                    |              |                         |             |           | 17               |           |             |            |                   | 18         | 94.44%          |
| River                        |             |          |                              |                 |                    |              |                         |             | 1         |                  | 10        |             |            |                   | 11         | 90.91%          |
| Tidal Creek                  |             |          |                              |                 |                    |              |                         |             |           |                  |           | 1           |            |                   | 1          | 100%            |
| Tidal Flat                   | 1           |          |                              |                 |                    |              | 1                       |             |           |                  |           |             | 16         |                   | 18         | 88.89%          |
| Uncultivated Land            |             |          |                              |                 |                    | 1            |                         |             |           |                  |           |             |            | 6                 | 7          | 85.71%          |
| <b>Total</b>                 | <b>25</b>   | <b>5</b> | <b>13</b>                    | <b>12</b>       | <b>14</b>          | <b>13</b>    | <b>15</b>               | <b>83</b>   | <b>97</b> | <b>17</b>        | <b>10</b> | <b>3</b>    | <b>16</b>  | <b>7</b>          | <b>330</b> |                 |
